## Research Paper

# Imaging of hypoxia-inducible factor 1 $\alpha$ and septin 9 interaction by bimolecular fluorescence complementation in live cancer cells

Maya Golan<sup>1</sup>, Nicola J. Mabjeesh<sup>1</sup><sup>1</sup>Prostate Cancer Research Laboratory, Department of Urology, Tel Aviv Sourasky Medical Center, Sackler Faculty of Medicine, Tel Aviv University, Tel Aviv, Israel

Correspondence to: Nicola J. Mabjeesh, email: nicolam@tlvmc.gov.il

Keywords: hypoxia-inducible factor 1 $\alpha$ , septin 9, bimolecular fluorescence complementation, cancer, imaging

Received: June 30, 2016

Accepted: March 15, 2017

Published: March 23, 2017

Copyright: Golan et al. This is an open-access article distributed under the terms of the Creative Commons Attribution License (CC-BY), which permits unrestricted use, distribution, and reproduction in any medium, provided the original author and source are credited.

## ABSTRACT

**Hypoxia-inducible factor 1 (HIF-1) is a major mediator of the hypoxic response involved in tumor progression. We had earlier described the interaction between septin 9 isoform 1 (SEPT9\_i1) protein and the oxygen-regulated subunit, HIF-1 $\alpha$ . SEPT9\_i1 is a member of the conserved family of GTP-binding cytoskeleton septins. SEPT9\_i1 stabilizes HIF-1 $\alpha$  and facilitates its cytoplasmic-nuclear translocation. We utilized split yellow fluorescent protein (YFP) bimolecular fluorescence complementation (BiFC) methodology to monitor the interaction between HIF-1 $\alpha$  and SEPT9\_i1 in live cells. N-terminal (YN) and C-terminal (YC) split YFP chimeras with HIF-1 $\alpha$  and SEPT9\_i1 on both their amino and carboxyl termini were generated. HIF-1 $\alpha$  and SEPT9\_i1 chimeras were expressed in cancer cells and screened for functional complementation. SEPT9\_i1-YN and YC-HIF-1 $\alpha$  formed a long-lived highly stable complex upon interaction. The BiFC signal was increased in the presence of hypoxia-mimicking agents. In contrast, YC- $\Delta$ H1H-HIF-1 $\alpha$  chimera, which lacked the helix-loop-helix domain that is essential for the interaction with SEPT9\_i1 as well as the expression of SEPT9\_i1 252-379 amino acids fragment required for the interaction with HIF-1 $\alpha$ , significantly reduced the BiFC signal. The signal was also reduced when cells were treated with 17-N-allylamino-17-demethoxygeldanamycin, an HSP90 inhibitor that inhibits HIF-1 $\alpha$ . It was increased with fourchlorfenuron, a small molecule that increases the interaction between HIF-1 $\alpha$  and SEPT9\_i1. These results reconfirmed the interaction between HIF-1 $\alpha$  and SEPT9\_i1 that was imaged in live cells. This BiFC system represents a novel approach for studying the real-time interaction between these two proteins and will allow high-throughput drug screening to identity compounds that disrupt this interaction.**

## INTRODUCTION

Hypoxia is a common finding in advanced human tumors and it is often associated with metastatic dissemination and poor prognosis [1]. The primary mechanism mediating adaptive responses to hypoxia is the regulation of transcription by hypoxia-inducible factor (HIF) 1 and 2 [2]. Cancer-specific HIF activity, especially in regions of intratumoral hypoxia, has been shown to mediate angiogenesis, epithelial-mesenchymal transition, stem-cell maintenance, invasion, metastasis, and resistance to radiation therapy and chemotherapy [3–5]. HIF-1 is a heterodimeric transcription factor composed of a constitutively expressed HIF-1 $\beta$  subunit and an oxygen-regulated HIF-1 $\alpha$  subunit [6, 7]. Under normal

oxygen conditions, HIF-1 $\alpha$  is hydroxylated at specific proline residues (402 and 564), ubiquitinated by the tumor suppressor protein Von Hippel–Lindau (VHL) and targeted for proteasomal degradation. Under hypoxic conditions, hydroxylation is inhibited, and HIF-1 $\alpha$  rapidly accumulates in the cytoplasm and translocates into the nucleus. HIF-1 $\alpha$  then dimerizes with HIF-1 $\beta$  to recruit co-activators and drive transcription of many genes critical for key aspects of cancer pathogenesis [6, 8–10]. Increased levels of HIF-1 $\alpha$  have been demonstrated in the majority of primary human cancers and their metastases [11–13], and they were shown to be related to poor prognosis and treatment failure [2]. Anticancer effects of HIF-1 inhibition have been evidenced in mouse models of human cancer (see review [2]). Considering the profound impact of HIF-1 $\alpha$



on cancer progression, there has been vast growing interest in the biology of the HIF-1 $\alpha$  pathway and in the development of direct or indirect HIF-1 inhibitors for cancer therapy [14–17].

Targeting specific protein-protein interactions that play central roles in the HIF system offer therapeutic possibilities [18]. We previously described an activation of HIF-1 pathway that was mediated by septin 9 isoform 1 protein (SEPT9\_i1), a member of the mammalian septin family. SEPT9\_i1 is a product of septin 9 variant 1 (SEPT9\_v1) mRNA, originally designated as MSF-A [19]. This interaction increased HIF-1 $\alpha$  protein stability and HIF-1 transcriptional activity *in vitro* and promoted proliferation, tumor growth and angiogenesis *in vivo* [19]. Knocking down SEPT9\_i1 or disrupting HIF-1 $\alpha$ /SEPT9\_i1 interaction gave reciprocal effects: it led to the reduction of HIF-1 transcriptional activity and to decreased tumor growth and angiogenesis [20, 21]. Based on our accumulative data having indicated that this complex is important for tumor progression, we now aimed to target the HIF-1 $\alpha$  and SEPT9\_i1 interaction in the search for new inhibitors in the HIF-1 pathway. We chose to use a bimolecular fluorescence complementation (BiFC) assay that enables direct visualization of protein-protein interactions at high spatial resolution in live cells [22]. To design this BiFC assay, the yellow fluorescent protein (YFP) was split into two fragments (the N-terminal YN and the C-terminal YC) that are fused to the protein of interest (HIF-1 $\alpha$  and SEPT9\_i1). Reconstitution of the YFP fluorophore occurs when the two fragments of the split YFP are approximated to each other as a result of protein-protein interactions [23]. In this study, we established an *in vivo* binding assay for monitoring and imaging the intracellular localization of HIF-1 $\alpha$  and SEPT9\_i1 interactions in live cells. We showed specificity and validity of this assay using different genetic and pharmacological treatments to serve as a platform for screening new therapeutic compounds inhibiting HIF-1 $\alpha$ /SEPT9\_i1 interaction.

## RESULTS

### Generation of HIF-1 $\alpha$ /SEPT9\_i1 split-YFP system

We used YFP-based BiFC methodology in order to study the interaction between HIF-1 $\alpha$  and SEPT9\_i1 in live cancer cells. Split-YFP chimeras with either YN or YC on the N-terminal or C-terminal of each of the proteins were constructed as illustrated in Figure 1A. A yellow fluorescence signal is obtained after the interaction takes place (Figure 1B). The expression of HIF-1 $\alpha$ 's (Figure 2A) and SEPT9\_i1's (Figure 2B) chimeras was confirmed using Western blot analysis. Because HIF-1 $\alpha$ 's chimeras are susceptible to continuous degradation under normoxic conditions, more HIF-1 $\alpha$  plasmids were used

than SEPT9\_i1 plasmids (10:1) when co-transfected. Before visualization, the transfected cells were treated with CoCl<sub>2</sub>, an iron chelator that mimics hypoxia and stabilizes HIF-1 $\alpha$  under normoxic conditions [24]. All the different combinations of HIF-1 $\alpha$  and SEPT9\_i1 chimeras were tested for BiFC (data not shown). The pair combination that gave the best complementation signal was YC-HIF-1 $\alpha$  with SEPT9\_i1-YN (Figure 3), and it was chosen for further studies. In some cases we noticed some speckles distributed mainly in the cytoplasm as in Figure 3. These speckles most likely appeared because overexpression of the chimeras that tend to aggregate and accumulate in p-bodies as proposed by Förg T. et al. [25]. To confirm that the selected chimeras are able to interact with each other YC-HIF-1 $\alpha$  and SEPT9\_i1-YN were expressed in PC-3 cells and processed for immunofluorescence labeling with antibodies to HA (YC-HIF-1 $\alpha$ ) (red), and GFP-N' (SEPT9\_i1-YN) (green) as well as with DAPI (blue) (Supplementary Figure 1). Image analysis showed 70% colocalization (Supplementary Figure 1). We also examined whether the two chimeras are transcriptionally active using a reporter gene assay expressing luciferase under hypoxia-response elements (Supplementary Figure 2). HIF-1 transcriptional activity was significantly induced by hypoxia and further increased in the presence of both chimeras (Supplementary Figure 2). These results indicated that the selected chimeras interact with each other as well as with HIF-1 $\beta$  to be transcriptionally functional.

### Characterization of YC-HIF-1 $\alpha$ and SEPT9\_i1-YN interaction in live cells

We had previously identified the domains required for the interaction of HIF-1 $\alpha$  with SEPT9\_i1 as being the HLH domain of HIF-1 $\alpha$  and amino acids 252–379 domain within the GTPase domain of SEPT9\_i1 [26]. To confirm the specificity of the interacting chimeras, we designed and expressed YC-HIF-1 $\alpha$  lacking the HLH domain (YC-DHLH-HIF-1 $\alpha$ ) with full-length SEPT9\_i1-YN (Figure 4A). After transfection, the cells were incubated with another iron chelator dibenzoylmethane (DBM) [27], which induced a higher fluorescence signal than that of CoCl<sub>2</sub> (not shown) upon complementation. The BiFC signal was significantly lower when YC- $\Delta$ HLH-HIF-1 $\alpha$  was used compared with that of wild-type YC-HIF-1 $\alpha$  (Figure 4B and 4C). To further characterize the specificity of the BiFC signal, we used co-expression of the domain of SEPT9\_i1 (252-379aa) that is essential for the interaction with HIF-1 $\alpha$  together with the active chimeras. SEPT9\_i1 252-379aa fragment also reduced the BiFC signal obtained by YC-HIF-1 $\alpha$  and SEPT9\_i1-YN in the presence of DBM (Figure 4D). These results showed the specificity of the BiFC signal obtained from this system and re-confirmed our previous observations of the interacting sites of the two proteins.



## Pharmacological manipulation of YC-HIF-1 $\alpha$ and SEPT9\_i1-YN interaction

We then examined the ability of small molecule compounds to manipulate the interaction between HIF-1 $\alpha$  and SEPT9\_i1 in live cells. We used DBM that increases HIF-1 $\alpha$  stability alone or together with the geldanamycin derivative, 17-N-allylamino-17-demethoxygeldanamycin

(17-AAG), which is an HSP90 inhibitor known to decrease HIF-1 $\alpha$  stability [28, 29], or with forchlorfenuron (FCF) that was previously shown to increase HIF-1 $\alpha$ /SEPT9\_i1 interaction *in vitro* [30] (Figure 5). As shown in Figure 5, 17-AAG decreased the BiFC signal, while FCF significantly increased the BiFC signal. All signals were much lower in the YC- $\Delta$ HLH-HIF-1 $\alpha$  control transfected cells (Figure 5C). These results reconfirmed those of

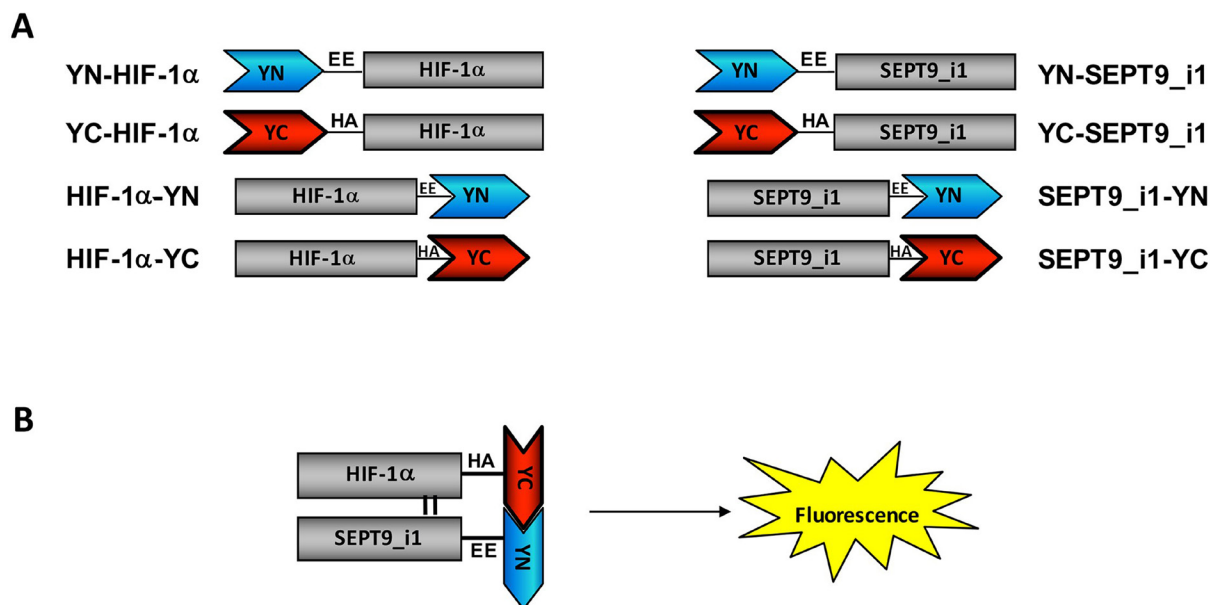

**Figure 1: Construction of split-YFP HIF-1 $\alpha$  and SEPT9\_i1 chimeras.** (A) Illustration of HIF-1 $\alpha$  and SEPT9\_i1 split-YFP different chimeras containing a flexible linker (black line) with EE or HA tagging for YN and YC chimeras, respectively. The names of each chimera along with their schematic representation are shown. (B) A schematic presentation of the bimolecular fluorescence complementation (BiFC) principle: refolding and maturation of the complete YFP occur during the interaction of two complementary chimeras (YC-HIF-1 $\alpha$  and SEPT9\_i1-YN, in this case), and a fluorescence signal is accepted upon excitation.

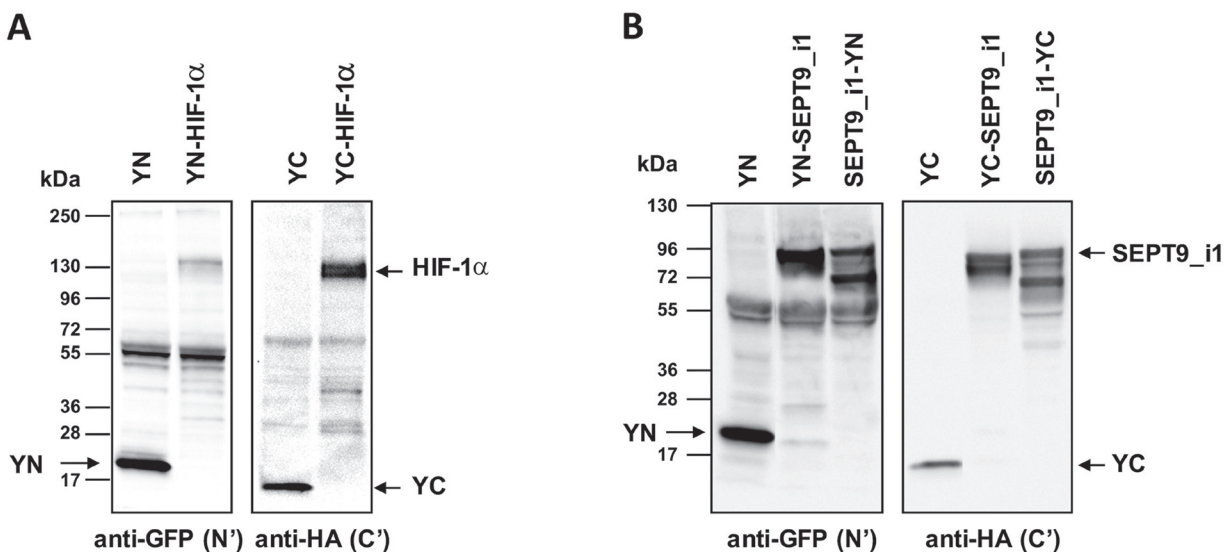

**Figure 2: Expression of split-YFP HIF-1 $\alpha$  and SEPT9\_i1 chimeras.** HEK-293T cells were transiently transfected with the different split-YFP constructs. (A) Expression of split-YFP HIF-1 $\alpha$  chimeras was analyzed by Western blotting, using anti-GFP-N' for YN chimeras and anti-HA for YC chimeras, respectively. (B) The same as in (A) for SEPT9\_i1 split-YFP chimeras.



our previous study showing that FCF increased HIF-1 $\alpha$ /SEPT9\_i1 interaction and that this interaction can be manipulated using small molecule compounds.

### Optimizing YC-HIF-1 $\alpha$ /SEPT9\_i1-YN BiFC signal

In order to increase the basal BiFC signal, we stably transfected PC-3 cells with SEPT9\_i1-YN and Tet-On

inducible YC-HIF-1 $\alpha$  (Figure 6A), after which the cells were selected for YC-HIF-1 $\alpha$  induction (Figure 6B). The BiFC signal of these stable cells was higher but only after DBM treatment (Figure 6C and 6D). Therefore, we next constructed HIF-1 $\alpha$  mutated in its two proline hydroxylation sites (proline residues 402 and 564 within the oxygen-dependent degradation domain [ODDD]) termed double proline mutated (DPM) into the YC vector to create a YC-HIF-1 $\alpha$ -DPM chimera (Figure 7A). This chimera was

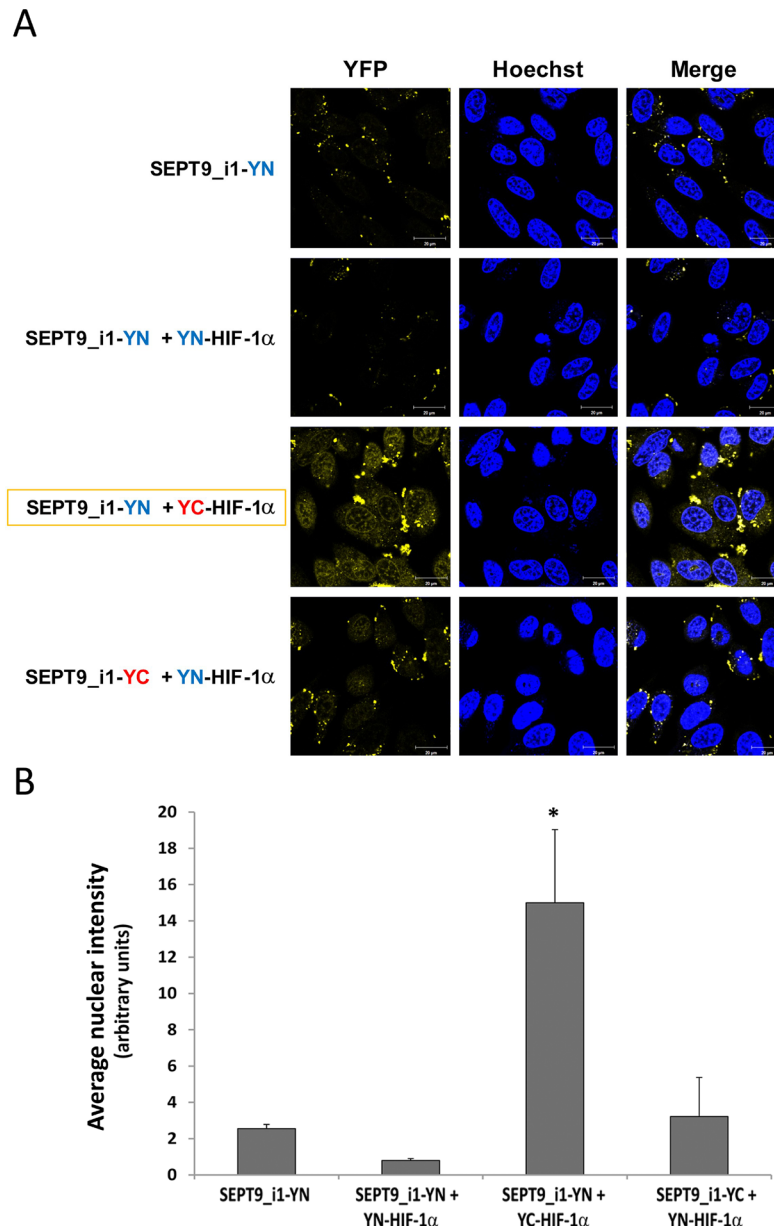

**Figure 3: Optimal BiFC of split-YFP HIF-1 $\alpha$  and SEPT9\_i1 chimeras.** (A) PC-3 cells were seeded on glass-bottomed plates and transiently transfected with the indicated split-YFP constructs, using 10-fold more HIF-1 $\alpha$  constructs (1  $\mu$ g) than that for SEPT9\_i1 constructs (0.1  $\mu$ g), and treated overnight with 250  $\mu$ M CoCl<sub>2</sub> (mimicking hypoxia) prior to imaging. Forty-eight hours following transfection, the cells were imaged by confocal microscopy (magnification  $\times$  63; scale bars, 20  $\mu$ m). Hoechst was employed for nuclear counter-staining (blue). The YC-HIF-1 $\alpha$ /SEPT9\_i1-YN pair produced the best signal (yellow). (B) Image analysis of the BiFC results shown in (A) comparing the nuclear staining intensity between the different pairs to the YN-SEPT9 control. The analysis was done on 3–8 different fields for each pair. Bars, SD; \* $P$  < 0.05 compared to each of the conditions.



indeed stable under normoxic conditions independent of DBM and with a higher basal BiFC signal (Figure 7B). Moreover, image analysis showed that the BiFC signal was mainly nuclear and ~11-fold higher than the BiFC signal when YC- $\Delta$ HDLH-HIF-1 $\alpha$  was used (Figure 7C). We believe the use of the YC-HIF-1 $\alpha$ /SEPT9\_i1 BiFC system reflected real-time protein-protein interaction which can serve as a platform for further studies in the future.

## DISCUSSION

In the present study, we generated a novel BiFC system that imaged real-time interaction between HIF-1 $\alpha$  and SEPT9\_i1 proteins in live cancer cells (Figures 1–3). The system proved to be sensitive to pharmacological treatments that influenced the levels of HIF-1 $\alpha$  protein or disrupted its interaction with SEPT9\_i1 protein (Figure 5).

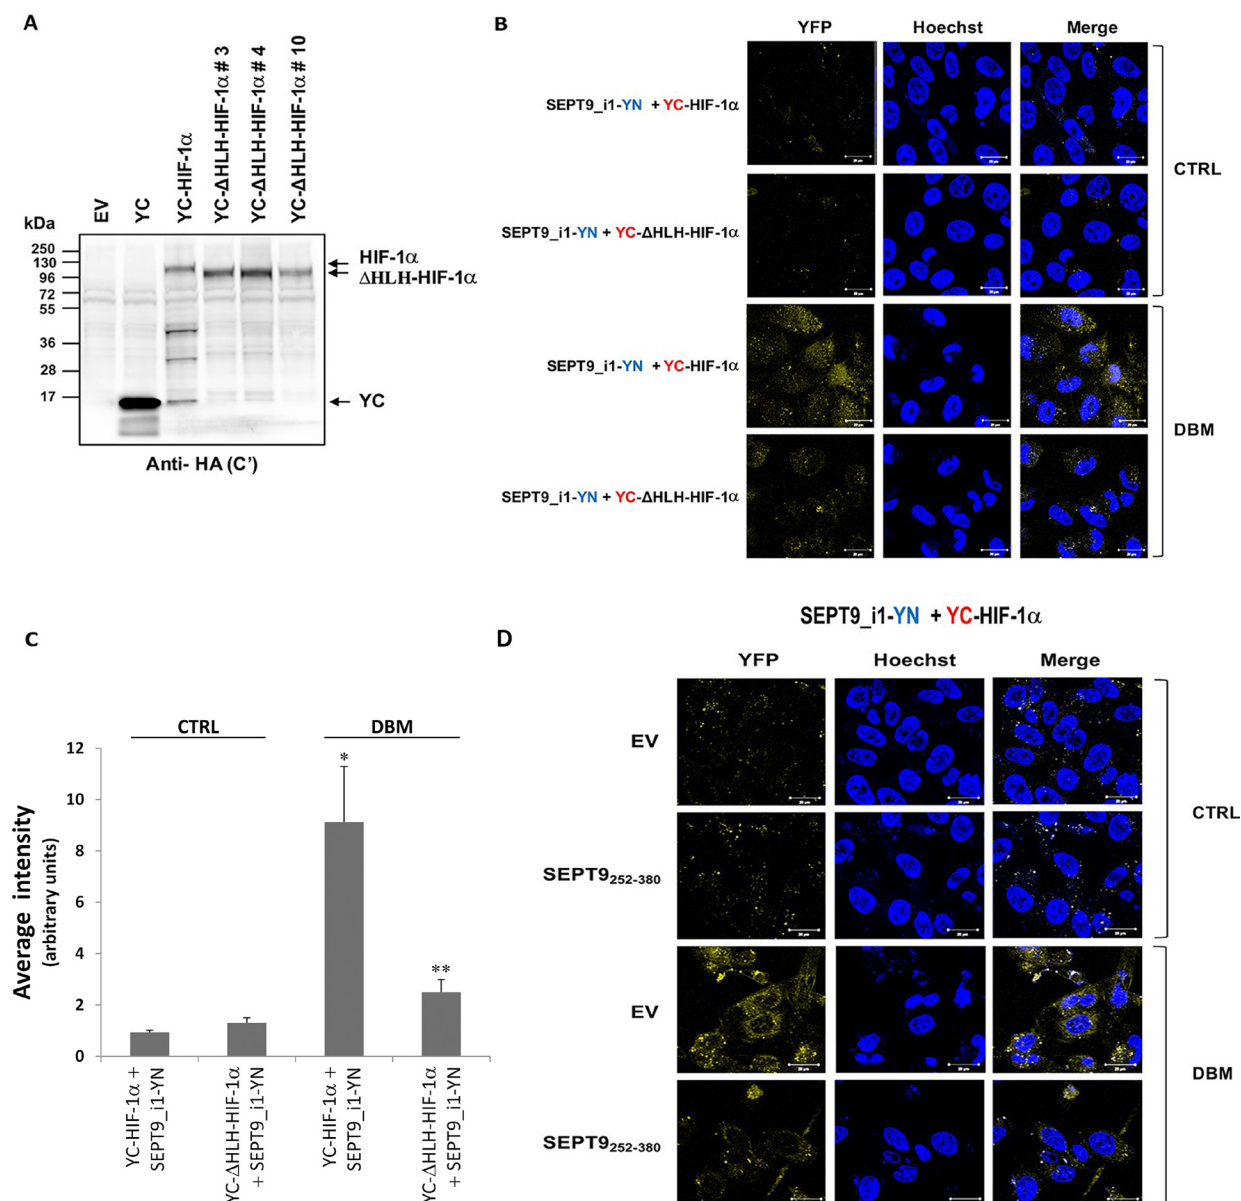

**Figure 4: Disrupting YC-HIF-1 $\alpha$ /SEPT9\_i1-YN interaction decreases BiFC signal.** (A) HEK-293T cells were transiently transfected with pCDNA3.1(+) empty vector (EV), pCDNA3.1(+) with YC only (YC), YC-HIF-1 $\alpha$  or YC- $\Delta$ HDLH-HIF-1 $\alpha$  constructs (clones #3, 4 and 10). After 48 hours, the cells were lysed and protein expression was analyzed by Western blotting using anti-HA antibody. (B) BiFC for PC-3 cells transiently transfected with YC-HIF-1 $\alpha$ /YC- $\Delta$ HDLH-HIF-1 $\alpha$  and SEPT9\_i1-YN or (D) with YC-HIF-1 $\alpha$  and SEPT9\_i1-YN together with SEPT9\_i1 252-379aa fragment (the domain essential for the interaction with HIF-1 $\alpha$ ) or with its empty vector (EV). Cells were treated overnight with 100  $\mu$ M DBM or with 0.01% DMSO as a vehicle control (CTRL) prior to imaging (magnification  $\times$  63; scale bars, 20  $\mu$ m). (C) Image analysis of the BiFC results comparing the whole cellular staining intensity between the different pairs. The analysis was done on 3-9 different fields for each pair. Columns, average of the means, Bars, SD; \* $P$  < 0.01 compared with corresponding CTRL; \*\* $P$  < 0.05 compared to YC-HIF-1 $\alpha$  and SEPT9\_i1-YN with DBM.



This unique assay reconfirmed our previous finding of identifying the HLH part of HIF-1 $\alpha$  and the GTPase part of SEPT9\_i1 as the interacting domains required for the protein-protein interaction (Figure 4).

The overexpression of both HIF-1 $\alpha$  and SEPT9\_i1 has been correlated with tumor progression in numerous cancers. SEPT9 has been found to be overexpressed in diverse human tumors, including breast, head and neck, ovarian, endometrial, kidney, and pancreatic cancer [31–33], and its overexpression was recently shown to correlate with high-grade breast cancer [34] and prostate cancer [35]. HIF-1 $\alpha$  up-regulation under normoxic conditions has been noted with increasing frequency in many cancers [36]. We had earlier shown that SEPT9\_i1 upregulates HIF-1 $\alpha$  in an oxygen-independent manner [21, 26]. Evidently, any interference of this interaction either by a specific shRNA to SEPT9\_i1 [20] or by a SEPT9\_i1 N-terminal peptide, which competes with SEPT9\_i1 in the interaction with the nuclear transporter

importin- $\alpha$  [21], decreases HIF-1 activation, tumor progression and angiogenesis.

Furthermore, when utilizing another mode of HIF-1 $\alpha$ /SEPT9\_i1 complex disruption such as reducing the dissociation of SEPT9\_i1 filaments from the complex by FCF leads to the inhibition of the HIF-1 pathway and suppression of tumorigenic properties of prostate cancer cells [30, 37]. Therefore, we believe that disruption of the HIF-1 $\alpha$ /SEPT9\_i1 complex is beneficial for cancer therapy, and that the BiFC system is vitally important for evaluating novel compounds capable of disrupting the protein-protein interaction.

Using the double proline-mutated and nondegradable species of HIF-1 $\alpha$  (Figure 7) adds an advantage to this system, especially in the search for molecules to disrupt the interaction per se rather than molecules that accelerate the degradation of HIF-1 $\alpha$ . Secondly, this HIF-1 $\alpha$  species is prevented from degradation under normal oxygen levels that are optimal for tumor cell growth. The BiFC system is

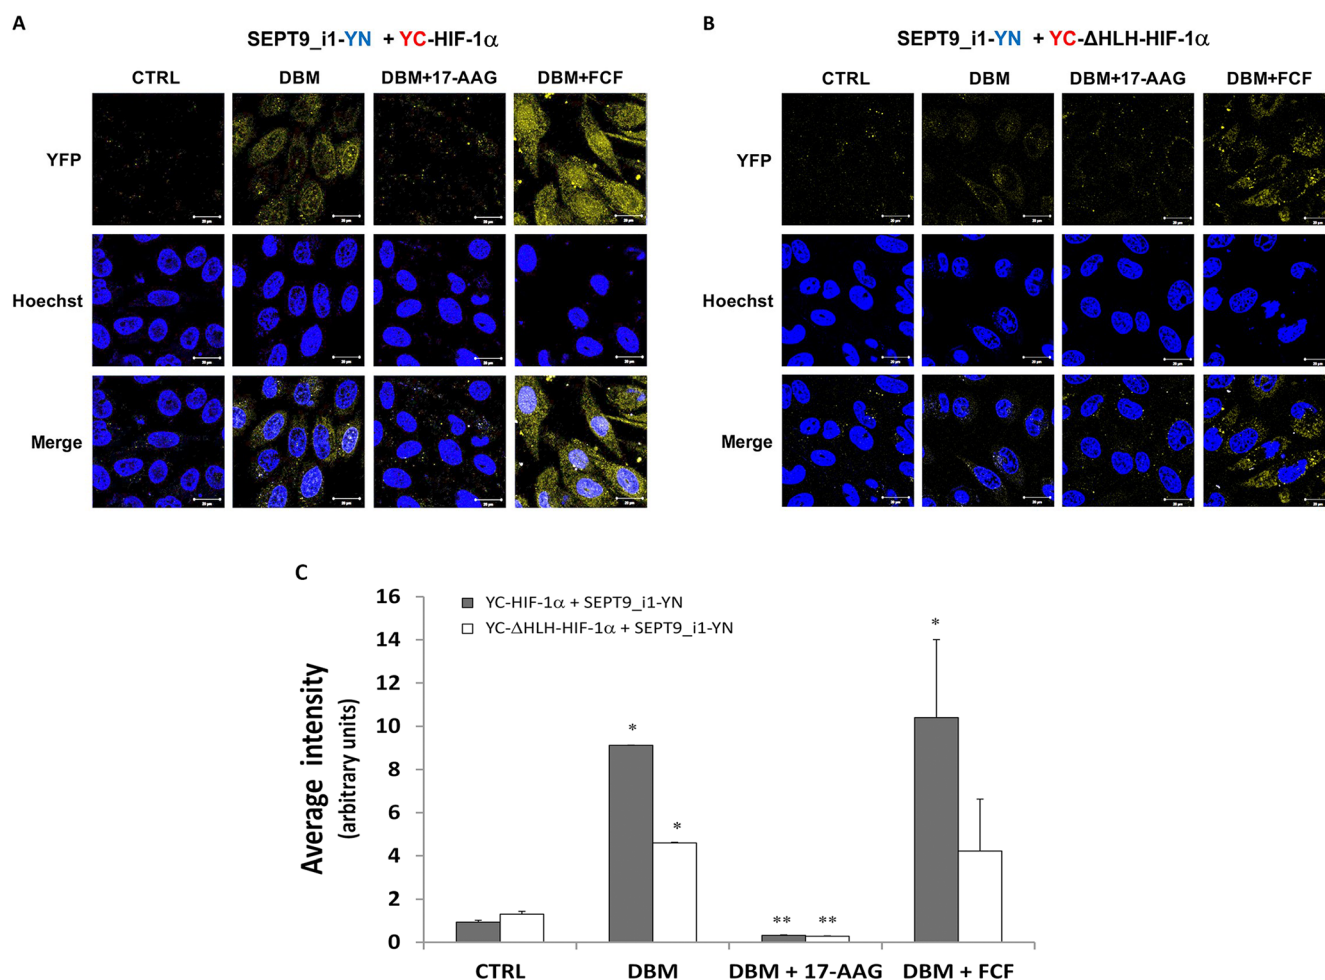

**Figure 5: Pharmacological manipulation of YC-HIF-1 $\alpha$ /SEPT9\_i1-YN BiFC.** BiFC for PC-3 cells that were transiently transfected with YC-HIF-1 $\alpha$  (A) or YC- $\Delta$ HLH (B) together with SEPT9\_i1-YN, and then treated overnight with 100  $\mu$ M DBM alone, with 100  $\mu$ M DBM and 1  $\mu$ M 17-AAG or 150  $\mu$ M FCF, or with 0.01% DMSO as control (CTRL) prior to imaging (magnification  $\times$  63; scale bars, 20  $\mu$ m). (C) Image analysis of the BiFC results comparing the whole cellular staining intensity between the different conditions. The analysis was done on 3-9 different fields for each pair. Columns, average of the means, Bars, SD; \*P < 0.05 compared to corresponding CTRL; \*\*P < 0.05 compared to corresponding DBM.



highly sensitive and can be used in the future to portray the interaction in living animals. Compared with fluorescence resonance energy transfer (FRET) methodology, BiFC has a more stable signal and can be used *in vivo* [38].

Limitations of this system include anticipated difficulties to pass the cells after multistep transfections

in large quantities until screening. In addition, fluorescent signals are very sensitive to minimal changes which may be caused by compounds with insignificant effects on HIF-1 $\alpha$ /SEPT9\_i1 interactions. It should also be taken into account that HIF-1 $\alpha$ /SEPT9\_i1 complex (BiFC signal) could be influenced by other cellular functions, such as

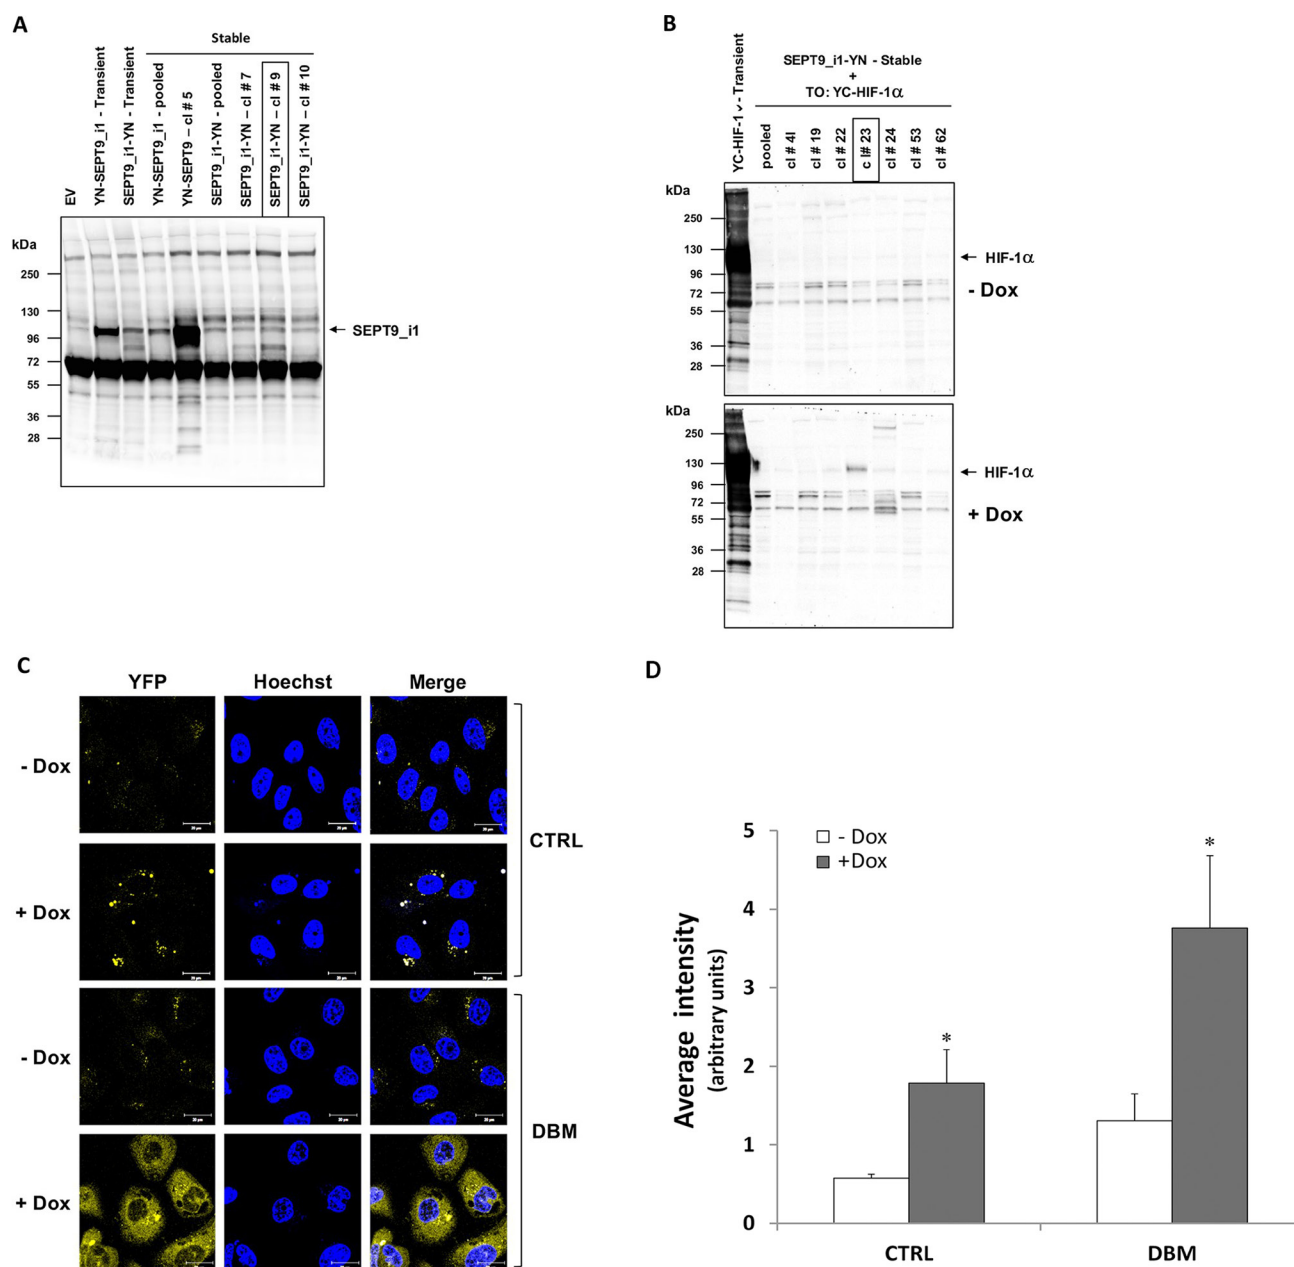

**Figure 6: Stable expression of split-YFP SEPT9\_i1-YN and inducible YC-HIF-1 $\alpha$  increases the BiFC signal.** PC-3 cells were transfected with pCDNA3.1(+) vector expressing the YN-SEPT9\_i1/SEPT9\_i1-YN chimeras and selected with G418. (A) Expression of the YN-SEPT9\_i1/SEPT9\_i1-YN analyzed by Western blotting using anti-GFP-N<sup>3</sup> antibody. SEPT9\_i1-YN stable clone (clone #9) was chosen for further transfections. (B) SEPT9\_i1-YN+Tet-On-YC-HIF-1 $\alpha$  stable clones were untreated or treated with 1  $\mu$ g/ml Dox for YC-HIF-1 $\alpha$  induction and analyzed by Western blotting using anti-HA antibody. Transient transfection of the same constructs served as positive controls in both (A) and (B). (C) BiFC for PC-3 cells stably transfected with SEPT9\_i1-YN and with Tet-On inducible YC-HIF-1 $\alpha$  (clone #23), untreated or treated overnight with 1  $\mu$ g/ml Dox for 3 days and with 100  $\mu$ M DBM or 0.01% DMSO as control (CTRL) prior to imaging (magnification  $\times$  63; scale bars, 20  $\mu$ m). (D) Image analysis of the BiFC results comparing the whole cellular staining intensity between the different conditions. The analysis was done on 3-9 different fields for each pair. Columns, average of the means, Bars, SD; \* $P$  < 0.05 compared to corresponding - DOX.



the androgen-androgen receptor pathway, which does not exist in PC-3 prostate cancer cells. It is still encouraging to document changes after manipulating the interaction by using small molecule compounds, such as the HSP90 inhibitor 17-AAG, FCF, and DBM. This may reflect the reliability of the system.

In this study, we have established a novel BiFC system for studying and visualizing the interaction between the HIF-1 $\alpha$  protein and the SEPT9\_i1 protein. This assay represents a novel approach for studying and further investigating the real-time interaction between these two proteins in live cells. In addition, this system will allow high-throughput drug screening to identify compounds that disrupt the interaction between HIF-1 $\alpha$  and SEPT9\_i1. The distinct advantage of this system is that it will also allow target validation of identified compounds in the future.

## MATERIALS AND METHODS

### Cell culture

Human prostate cancer PC-3 cells were maintained in RPMI 1640 and human embryonic kidney cells (HEK 293T) were maintained in DMEM. All media were supplemented with 10% FCS and antibiotics. Cells were cultured at 37°C in a humidified atmosphere and 5% CO<sub>2</sub> in air.

### Antibodies and reagents

The following primary antibodies were used: rabbit polyclonal antibody to SEPT9\_i1, which was previously produced and characterized [19, 35], mouse monoclonal anti-HIF-1 $\alpha$  (BD Biosciences, San Diego, CA), rabbit monoclonal anti-GFP (N-term) (Abcam, Cambridge, MA)

and mouse monoclonal anti-hemagglutinin (HA) (Covance, Berkley, CA). Horseradish peroxidase conjugated secondary antibodies were used for Western blotting (Jackson ImmunoResearch, West Grove, PA). Dibenzoylmethane (DBM), 17-N-allylamino-17-demethoxygeldanamycin (17-AAG), forchlorfenuron (FCF) and doxycycline (Dox) were purchased from Sigma-Aldrich (St. Louis, MO).

### Plasmids construction

The human Flag-tagged HIF-1 $\alpha$ ,  $\Delta$ H1H-HIF-1 $\alpha$  (HIF-1 $\alpha$  truncated at the H1H domain), HIF-1 $\alpha$ -DPM (double proline mutation; HIF-1 $\alpha$  mutated in prolines residues 402 and 564) and SEPT9\_v1 used in this study have been described elsewhere [19, 26]. The split yellow fluorescent protein (YFP) constructs YN-EE, YC-HA, EE-YN and HA-YC [39] were a gift from S. Yalovsky and N. Ohad (Tel Aviv University, Israel) [40, 41]. YN-EE and EE-YN constructs contain a cDNA encoding for the N-terminal fragment of YFP (YN; residues 1–154 of YFP) fused to a 5-amino-acid linker (RSIAT), which, in turn, is fused to a 9-amino-acid EE tag. YC-HA and HA-YC constructs contain a cDNA encoding for the C-terminal fragment of YFP (YC; residues 155–238 of YFP) fused to a 17-amino-acid linker (RPACKIPNDLKQKVMNH), which, in turn, is fused to a 9-amino acid HA tag. YN-EE and YC-HA were cloned into pCDNA3.1(+) vector (Invitrogen, Carlsbad, CA), while EE-YN and HA-YC were cloned into pcDNA4A/Myc-His (Invitrogen) using PCR with the indicated primers and restriction enzymes (Table 1). Flag-tagged HIF-1 $\alpha$ ,  $\Delta$ H1H-HIF-1 $\alpha$ , HIF-1 $\alpha$ -DPM and SEPT9\_i1 [26] were re-cloned into these vectors and verified by sequencing (Table 1). Tet-On-induced HIF-1 $\alpha$  was constructed by re-cloning YC-HIF-1 $\alpha$  into a pcDNA5/TO vector (Invitrogen) (Table 1).

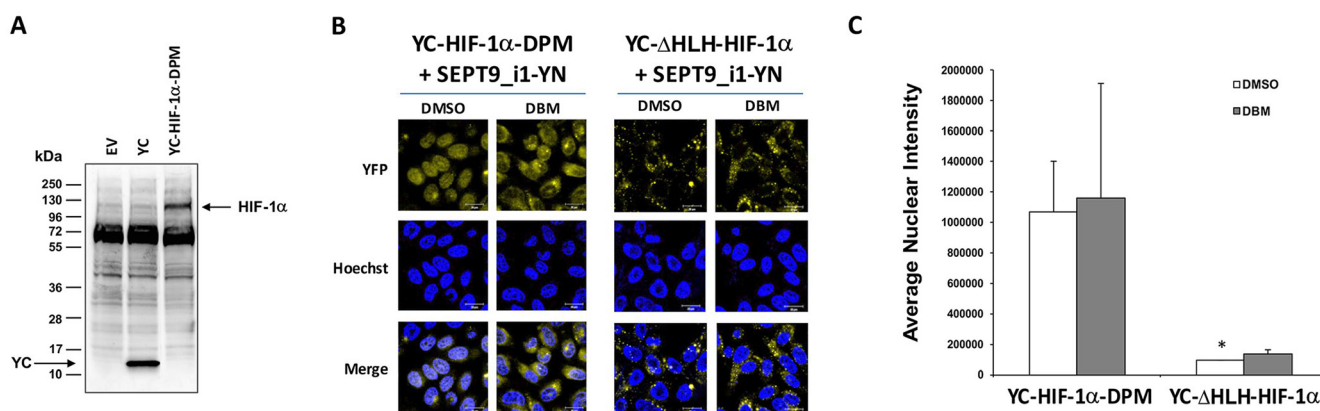

**Figure 7: Double-proline mutated YC-HIF-1 $\alpha$  increases nuclear BiFC signal.** (A) HEK-293T cells were transiently transfected with pCDNA3.1(+) empty vector (EV), pCDNA3.1(+) with YC only (YC) or with YC-HIF-1 $\alpha$ -DPM constructs. After 48 hours, the cells were lysed and subjected to Western blot analysis using anti-HA antibody. (B) BiFC for PC-3 cells transiently transfected with YC-HIF-1 $\alpha$ -DPM or YC-HIF-1 $\alpha$ - $\Delta$ H1H together with SEPT9\_i1-YN were treated overnight with 100  $\mu$ M DBM or with 0.01% DMSO as vehicle control prior to imaging (magnification  $\times$  63; scale bars, 20  $\mu$ m). (C) Image analysis of the BiFC results comparing the nuclear and the whole cellular staining intensity between the YC-HIF-1 $\alpha$ -DPM/SEPT9\_i1-YN pair to the YC-HIF-1 $\alpha$ -HIF-1 $\alpha$ - $\Delta$ H1H/SEPT9\_i1-YN pair, both with the DMSO vehicle control. \* $P$  < 0.05.



**Table 1: Plasmids and primers used for constructs design**

| Construct name                   | Vector           | Restriction sites    | Templates                          | Tag | PCR primers                                      |
|----------------------------------|------------------|----------------------|------------------------------------|-----|--------------------------------------------------|
| pcDNA3.1(+)-YN-H                 | pcDNA3.1(+)      | <i>EcoRV, NotI</i>   | YN-EE                              | EE  | CGTAGATATCATGGTG<br>AGCAAGGGCG                   |
|                                  |                  |                      |                                    |     | CGTACCCGCGGCCGC<br>TTCCATAGGCATATACT<br>CTTCCTC  |
| pcDNA3.1(+)-YC-H                 | pcDNA3.1(+)      | <i>EcoRV, NotI</i>   | YC-HA                              | HA  | CGTAGATATCATGGCCG<br>ACAAGCAGAAGAACG             |
|                                  |                  |                      |                                    |     | CGTACCCGCGGCCGCC<br>GCATAGTCAGGAACAT<br>CGTAAG   |
| pcDNA3.1(+)-YN-S                 | pcDNA3.1(+)      | <i>NheI, HindIII</i> | YN-EE                              | EE  | CGTGGCTAGCATGGTGA<br>GCAAGGGCG                   |
|                                  |                  |                      |                                    |     | CGTAAAGCTT TTCCATA<br>GGCATATACTCTTCCTC          |
| pcDNA3.1(+)-YC-S                 | pcDNA3.1(+)      | <i>NheI, HindIII</i> | YC-HA                              | HA  | CGTGGCTAGCATGGCC<br>GACAAGCAGAAGAACG             |
|                                  |                  |                      |                                    |     | CGTAAAGCTTCGCATAG<br>TCAGGAACATCGTAAG            |
| pcDNA4A-S-YN                     | pcDNA4A          | <i>XbaI, PmeI</i>    | EE-YN                              | EE  | CGTATCTAGAGAAGAGG<br>AAGAGTATATGCCTATG           |
|                                  |                  |                      |                                    |     | CGTAGTTTAAACTCACA<br>TGATATAGACGTTGTGG<br>CTGTTG |
| pcDNA4A-S-YC                     | pcDNA4A          | <i>XbaI, PmeI</i>    | HA-YC                              | HA  | CGTATCTAGATACCCTT<br>ACGATGTTCTTGAC              |
|                                  |                  |                      |                                    |     | CGTAGTTTAAACTTACTT<br>GTACAGCTCGTCCATG           |
| YN-HIF-1 $\alpha$                | pcDNA3.1(+)-YN-H | <i>NotI, XbaI</i>    | Flag-HIF-1 $\alpha$                | EE  |                                                  |
| YC-HIF-1 $\alpha$                | pcDNA3.1(+)-YC-H | <i>NotI, XbaI</i>    | Flag-HIF-1 $\alpha$                | HA  |                                                  |
| YN-SEPT9_i1                      | pcDNA3.1(+)-YN-S | <i>HindIII, XbaI</i> | Flag-SEPT9_i1                      | EE  |                                                  |
| YC-SEPT9_i1                      | pcDNA3.1(+)-YC-S | <i>HindIII, XbaI</i> | Flag-SEPT9_i1                      | HA  |                                                  |
| HIF-1 $\alpha$ -YN               | pcDNA4A-YN-S     | <i>XbaI, PmeI</i>    | Flag-HIF-1 $\alpha$                | EE  |                                                  |
| HIF-1 $\alpha$ -YC               | pcDNA4A-YC-S     | <i>XbaI, PmeI</i>    | Flag-HIF-1 $\alpha$                | HA  |                                                  |
| SEPT9_i1-YN                      | pcDNA4A-YN-S     | <i>XbaI, PmeI</i>    | Flag-SEPT9_i1                      | EE  |                                                  |
| SEPT9_i1-YC                      | pcDNA4A-YC-S     | <i>XbaI, PmeI</i>    | Flag-SEPT9_i1                      | HA  |                                                  |
| YC- $\Delta$ HLLH-HIF-1 $\alpha$ | pcDNA3.1(+)-YC-H | <i>NotI, XbaI</i>    | Flag- $\Delta$ HLLH-HIF-1 $\alpha$ | HA  |                                                  |
| TO-YC-HIF-1 $\alpha$             | pcDNA5/TO        | <i>EcoRV, XbaI</i>   | YC-HIF-1 $\alpha$                  | HA  |                                                  |

HIF, hypoxia-inducible factor; SEPT9\_i1, septin 9 isoform 1; HA, hemagglutinin; EE, E epitope; YN, N-terminal fragment of yellow fluorescent protein; YC, C-terminal fragment of yellow fluorescent protein.

### Transfection procedures

Cells were transiently transfected using Fugene transfection reagent (Promega, Madison, WI), according to the manufacturer's procedure. The amount of HIF-1 $\alpha$

plasmids was 10-fold higher than that of the SEPT9\_i1 plasmids used for transient co-transfections. PC-3 cells stably expressing split-YFP SEPT9\_i1-YN and an inducible YC-HIF-1 $\alpha$  were generated in three steps. First, the cells were transfected with SEPT9\_i1-YN plasmid



and the stable clones were selected and cultured in medium containing 100 µg/ml Zeocin (Bio Basic Canada, Canada), after which SEPT9<sub>i1</sub>-YN expression in single clones was analyzed by Western blotting. Then, a selected clone stably expressing SEPT9<sub>i1</sub>-YN was transfected with pcDNA6/TR (Invitrogen), and single clones were selected and cultured in medium containing both 20 µg/ml blasticidin S (Invivogen) and 100 µg/ml Zeocin. Selected clones were transiently transfected with pcDNA5/TO-YC-HIF-1α. In order to select a single clone expressing the tet-repressor, the cells were untreated or treated with 1 µg/ml doxycycline for 72 hours and analyzed by Western blotting. Finally, selected clones expressing both SEPT9<sub>i1</sub>-YN and tet-repressor were transfected with pcDNA5/TO-YC-HIF-1α. Stable clones were selected in media containing 250 µg/ml hygromycin (Invitrogen), 20 µg/mL blasticidin S and 100 µg/ml Zeocin. Inducible expression of YC-HIF-1α was confirmed by Western blotting.

### Protein extraction and Western blotting

HEK293 or PC-3 cells were analyzed as previously described [42]. Protein concentrations were determined using a bicinchoninic acid protein assay kit (Pierce, Rockford, IL), and 50–70 µg protein were subjected to SDS-PAGE followed by Western blotting. YN fragments were detected using anti-GFP-N' antibody, and YC fragments were detected using anti-HA antibody, respectively. The signal was detected using an enhanced chemiluminescence kit (Clarity, Bio-Rad Laboratories, Richmond, CA) and digitally captured by MicroChem (DNR Bio-imaging Systems, Jerusalem, Israel).

### Live cell fluorescence confocal microscopy

PC-3 cells were cultured on 35-mm glass-bottom plates and transiently transfected with the indicated plasmids. Forty-eight hours following transfection, the cells were imaged by a Zeiss LSM 710 confocal microscope for BiFC yellow fluorescence signal and for Hoechst nuclear staining. Laser and microscope settings were set to obtain optimal signals, following the manufacturer's instructions. Identical parameters (e.g., scanning line, laser light, contrast, and brightness) were used for comparing fluorescence intensities of the different conditions. From 4–6 microscopic fields were taken from each sample, and a representative field is shown in Figures. Western blotting analysis was performed to confirm the expression of each chimera or other proteins by. The expression of the chimeras and SEPT9<sub>252–380</sub> was verified by immunoblotting using the respective antibodies; for SEPT9<sub>252–380</sub> antibody to myc was used according to its c-terminal tag.

### Image and statistical analysis

Image analysis was performed using ImageJ software (<http://rsb.info.nih.gov/ij>). Hoechst staining was used to

define the nuclear region of interest (ROI). Quantitative fluorescence data were exported from ImageJ-generated histograms into Microsoft Excel software for further analysis and presentation. Mean nuclear staining of all cells quantified from 4 different fields and under the different conditions was calculated and compared. The data are expressed as average of the means ± SD. When the number of speckles in the cytoplasm was high as in Figures 3 and 7, the quantitative analysis included only nuclear complementation signals based on DAPI staining. Student's *t* test was used to compare differences between the selected conditions. Statistical significance was set at *P* < 0.05.

### CONFLICTS OF INTEREST

The authors declare no conflicts of interest.

### GRANT SUPPORT

This project was funded by the Dr. Miriam and Sheldon G. Adelson Medical Research Foundation (AMRF).

### REFERENCES

1. Yang C, Jiang L, Zhang H, Shimoda LA, DeBerardinis RJ, Semenza GL. Analysis of hypoxia-induced metabolic reprogramming. *Methods Enzymol.* 2014; 542:425–455.
2. Semenza GL. Defining the role of hypoxia-inducible factor 1 in cancer biology and therapeutics. *Oncogene.* 2010; 29:625–634.
3. Semenza GL. Hypoxia-inducible factors: mediators of cancer progression and targets for cancer therapy. *Trends Pharmacol Sci.* 2012; 33:207–214.
4. Strofer M, Jelkmann W, Metzen E, Brockmeier U, Dunst J, Depping R. Stabilisation and knockdown of HIF—two distinct ways comparably important in radiotherapy. *Cell Physiol Biochem.* 2011; 28:805–812.
5. Unruh A, Ressel A, Mohamed HG, Johnson RS, Nadrowitz R, Richter E, Katschinski DM, Wenger RH. The hypoxia-inducible factor-1 alpha is a negative factor for tumor therapy. *Oncogene.* 2003; 22:3213–3220.
6. Wang GL, Jiang BH, Rue EA, Semenza GL. Hypoxia-inducible factor 1 is a basic-helix-loop-helix-PAS heterodimer regulated by cellular O<sub>2</sub> tension. *Proc Natl Acad Sci USA.* 1995; 92:5510–5514.
7. Wang GL, Semenza GL. Purification and characterization of hypoxia-inducible factor 1. *J Biol Chem.* 1995; 270:1230–1237.
8. Semenza GL. Regulation of oxygen homeostasis by hypoxia-inducible factor 1. *Physiology (Bethesda).* 2009; 24:97–106.
9. Semenza GL. Hypoxia-inducible factor 1 (HIF-1) pathway. *Sci STKE.* 2007; 2007:cm8.



10. Semenza GL. Vascular responses to hypoxia and ischemia. *Arterioscler Thromb Vasc Biol.* 2010; 30:648–652.
11. Talks KL, Turley H, Gatter KC, Maxwell PH, Pugh CW, Ratcliffe PJ, Harris AL. The expression and distribution of the hypoxia-inducible factors HIF-1 $\alpha$  and HIF-2 $\alpha$  in normal human tissues, cancers, and tumor-associated macrophages. *Am J Pathol.* 2000; 157:411–421.
12. Zhong H, De Marzo AM, Laughner E, Lim M, Hilton DA, Zagzag D, Buechler P, Isaacs WB, Semenza GL, Simons JW. Overexpression of hypoxia-inducible factor 1 $\alpha$  in common human cancers and their metastases. *Cancer Res.* 1999; 59:5830–5835.
13. Mabeesh NJ, Amir S. Hypoxia-inducible factor (HIF) in human tumorigenesis. *Histol Histopathol.* 2007; 22:559–572.
14. Koh MY, Spivak-Kroizman TR, Powis G. Inhibiting the hypoxia response for cancer therapy: the new kid on the block. *Clin Cancer Res.* 2009; 15:5945–5946.
15. Kong D, Park EJ, Stephen AG, Calvani M, Cardellina JH, Monks A, Fisher RJ, Shoemaker RH, Melillo G. Echinomycin, a small-molecule inhibitor of hypoxia-inducible factor-1 DNA-binding activity. *Cancer Res.* 2005; 65:9047–9055.
16. Lee K, Zhang H, Qian DZ, Rey S, Liu JO, Semenza GL. Acriflavine inhibits HIF-1 dimerization, tumor growth, and vascularization. *Proc Natl Acad Sci USA.* 2009; 106:17910–17915.
17. Masoud GN, Li W. HIF-1 $\alpha$  pathway: role, regulation and intervention for cancer therapy. *Acta Pharm Sin B.* 2015; 5:378–389.
18. Wilkins SE, Abboud MI, Hancock RL, Schofield CJ. Targeting Protein-Protein Interactions in the HIF System. *ChemMedChem.* 2016; 11:773–786.
19. Amir S, Wang R, Matzkin H, Simons JW, Mabeesh NJ. MSF-A interacts with hypoxia-inducible factor-1 $\alpha$  and augments hypoxia-inducible factor transcriptional activation to affect tumorigenicity and angiogenesis. *Cancer Res.* 2006; 66:856–866.
20. Amir S, Golan M, Mabeesh NJ. Targeted knockdown of SEPT9\_v1 inhibits tumor growth and angiogenesis of human prostate cancer cells concomitant with disruption of hypoxia-inducible factor-1 pathway. *Mol Cancer Res.* 2010; 8:643–652.
21. Golan M, Mabeesh NJ. SEPT9\_i1 is required for the association between HIF-1 $\alpha$  and importin- $\alpha$  to promote efficient nuclear translocation. *Cell Cycle.* 2013; 12:2297–2308.
22. Hiatt SM, Duren HM, Shyu YJ, Ellis RE, Hisamoto N, Matsumoto K, Kariya K, Kerppola TK, Hu CD. *Caenorhabditis elegans* FOS-1 and JUN-1 regulate plc-1 expression in the spermatheca to control ovulation. *Mol Biol Cell.* 2009; 20:3888–3895.
23. Hu CD, Chinenov Y, Kerppola TK. Visualization of interactions among bZIP and Rel family proteins in living cells using bimolecular fluorescence complementation. *Mol Cell.* 2002; 9:789–798.
24. Yuan Y, Hilliard G, Ferguson T, Millhorn DE. Cobalt inhibits the interaction between hypoxia-inducible factor- $\alpha$  and von Hippel-Lindau protein by direct binding to hypoxia-inducible factor- $\alpha$ . *J Biol Chem.* 2003; 278:15911–15916.
25. Förg T, Ponce L, Tomsche A, Holloschi A, Lux A, Hafner M. Bimolecular fluorescence complementation (BiFC) to investigate composition and cellular localization of homo- and heterodimeric transmembrane receptors and intracellular signalling pathways. In: Méndez-Vilas A, Díaz J, eds. *Microscopy: Science, Technology, Applications and Education.* (Spain: FORMATEX). 2010:747–755.
26. Amir S, Wang R, Simons JW, Mabeesh NJ. SEPT9\_v1 up-regulates hypoxia-inducible factor 1 by preventing its RACK1-mediated degradation. *J Biol Chem.* 2009; 284:11142–11151.
27. Mabeesh NJ, Willard MT, Harris WB, Sun HY, Wang R, Zhong H, Umbreit JN, Simons JW. Dibenzoylmethane, a natural dietary compound, induces HIF-1  $\alpha$  and increases expression of VEGF. *Biochem Biophys Res Commun.* 2003; 303:279–286.
28. Liu YV, Baek JH, Zhang H, Diez R, Cole RN, Semenza GL. RACK1 competes with HSP90 for binding to HIF-1 $\alpha$  and is required for O-independent and HSP90 inhibitor-induced degradation of HIF-1 $\alpha$ . *Mol Cell.* 2007; 25:207–217.
29. Mabeesh NJ, Post DE, Willard MT, Kaur B, Van Meir EG, Simons JW, Zhong H. Geldanamycin induces degradation of hypoxia-inducible factor 1 $\alpha$  protein via the proteasome pathway in prostate cancer cells. *Cancer Res.* 2002; 62:2478–2482.
30. Vardi-Oknin D, Golan M, Mabeesh NJ. Forchlorfenuron disrupts SEPT9\_i1 filaments and inhibits HIF-1. *PLoS One.* 2013; 8:e73179.
31. Connolly D, Yang Z, Castaldi M, Simmons N, Oktay MH, Coniglio S, Fazzari MJ, Verdier-Pinard P, Montagna C. Septin 9 isoform expression, localization and epigenetic changes during human and mouse breast cancer progression. *Breast Cancer Res.* 2011; 13:R76.
32. Gonzalez ME, Peterson EA, Privette LM, Loffreda-Wren JL, Kalikin LM, Petty EM. High SEPT9\_v1 expression in human breast cancer cells is associated with oncogenic phenotypes. *Cancer Res.* 2007; 67:8554–8564.
33. Stanbery L, D'Silva NJ, Lee JS, Bradford CR, Carey TE, Prince ME, Wolf GT, Worden FP, Cordell KG, Petty EM. High SEPT9\_v1 Expression Is Associated with Poor Clinical Outcomes in Head and Neck Squamous Cell Carcinoma. *Transl Oncol.* 2010; 3:239–245.
34. Connolly D, Hoang HG, Adler E, Tazearslan C, Simmons N, Bernard VV, Castaldi M, Oktay MH, Montagna C. Septin 9 amplification and isoform-specific expression in peritumoral and tumor breast tissue. *Biol Chem.* 2014; 395:157–167.
35. Gilad R, Meir K, Stein I, German L, Pikarsky E, Mabeesh NJ. High SEPT9\_i1 protein expression is



- associated with high-grade prostate cancers. *PLoS One*. 2015; 10:e0124251.
36. Ranasinghe WK, Baldwin GS, Bolton D, Shulkes A, Ischia J, Patel O. HIF1alpha expression under normoxia in prostate cancer—which pathways to target? *J Urol*. 2015; 193:763–770.
  37. Vandromme M, Gauthier-Rouviere C, Lamb N, Fernandez A. Regulation of transcription factor localization: fine-tuning of gene expression. *Trends Biochem Sci*. 1996; 21:59–64.
  38. Choi CY, Chan DA, Paulmurugan R, Sutphin PD, Le QT, Koong AC, Zundel W, Gambhir SS, Giaccia AJ. Molecular imaging of hypoxia-inducible factor 1 alpha and von Hippel-Lindau interaction in mice. *Mol Imaging*. 2008; 7:139–146.
  39. Bracha-Drori K, Shichrur K, Katz A, Oliva M, Angelovici R, Yalovsky S, Ohad N. Detection of protein-protein interactions in plants using bimolecular fluorescence complementation. *Plant J*. 2004; 40:419–427.
  40. Ohad N, Yalovsky S. Utilizing bimolecular fluorescence complementation (BiFC) to assay protein-protein interaction in plants. *Methods Mol Biol*. 2010; 655:347–358.
  41. Belanis L, Plowman SJ, Rotblat B, Hancock JF, Kloog Y. Galectin-1 is a novel structural component and a major regulator of h-ras nanoclusters. *Mol Biol Cell*. 2008; 19:1404–1414.
  42. Majeesh NJ, Escuin D, LaVallee TM, Pribluda VS, Swartz GM, Johnson MS, Willard MT, Zhong H, Simons JW, Giannakakou P. 2ME2 inhibits tumor growth and angiogenesis by disrupting microtubules and dysregulating HIF. *Cancer Cell*. 2003; 3:363–375.
